# Supplementary material
Source: Springer Nature journal article supplement (https://www.springermedizin.de/resource/supplementary/12879_2011_1635_MOESM2_ESM.pdf/9442962)

Convulsions Ambulance Calls /100,000

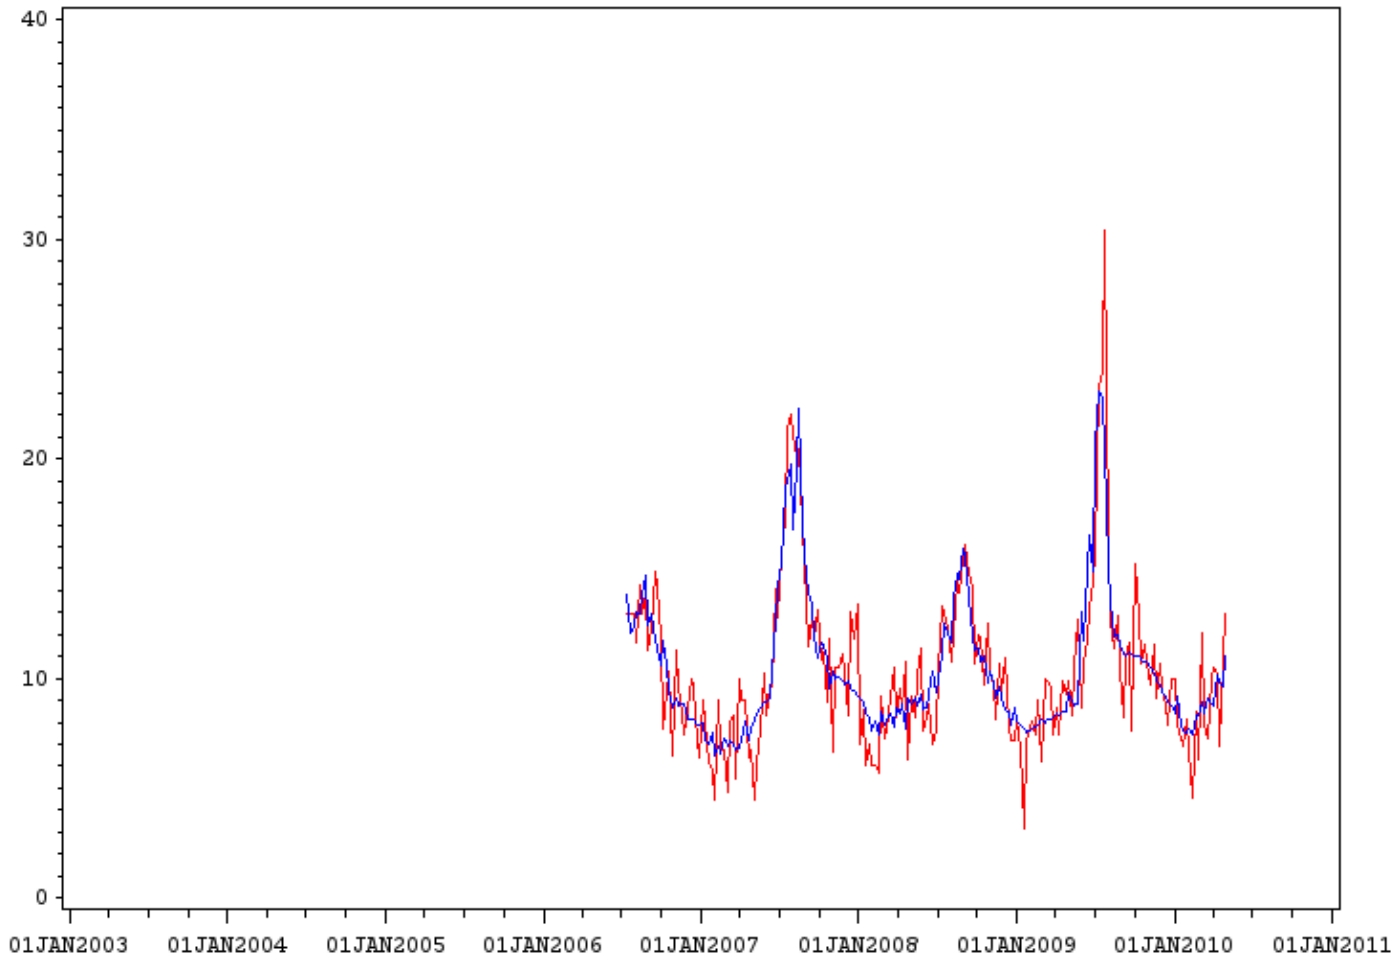

Week ending

— Observed

— Predicted

Supplement: MOESM2 [file 9442962]
